# Supplementary material for: Dynamics of ethyl cellulose nanoparticle self-assembly at the interface of a nematic liquid crystal droplet
Source: Royal Society of Chemistry journal article supplement (doi:10.1039/c7cp04421f), 2017-01-01
Supplement: c7cp04421f1.pdf [file c7cp04421f1.pdf]

## Supporting Information

### **Dynamics of ethyl cellulose nanoparticle self-assembly at the interface of a nematic liquid crystal droplet**

Yining Han<sup>a</sup>, Navid Bizmark<sup>a</sup>, Nasser Mohieddin Abukhdeir<sup>a,b</sup> and Marios A. Ioannidis<sup>a,\*</sup>

\*To whom correspondence should be addressed. Email: [mioannid@uwaterloo.ca](mailto:mioannid@uwaterloo.ca)

<sup>a</sup>Department of Chemical Engineering, University of Waterloo, 200 University Avenue West, Waterloo, Ontario N2L 3G1, Canada

<sup>b</sup>Department of Physics and Astronomy, University of Waterloo, 200 University Avenue West, Waterloo, Ontario N2L 3G1, Canada

### Drop-weight (drop-volume) tensiometry

Following the modified Tate's law given by Harkins and Brown,<sup>1</sup> we determined the interfacial tension of 5CB-water from<sup>2</sup>

$$\gamma = \frac{V(\rho_{5CB} - \rho_{water})g}{2\pi r \psi(r/V^{1/3})} \quad (S1)$$

where  $V$  is the volume of the falling drop,  $r$  is the internal radius of needle (0.3015 mm),  $g$  is the local acceleration of gravity, and  $\rho_{5CB}$  and  $\rho_{water}$  are the density of 5CB (1028 g L<sup>-1</sup>) and water (998 g L<sup>-1</sup>) at the given temperature (22°C), respectively.  $\psi(r/V^{1/3})$  is a correction factor<sup>2</sup> to account for deviations from hemisphericity. A drop of 5CB is formed in water and kept growing to a maximum size before it breaks away. Repeating the procedure for 5 times, we obtained a value of 41.5±0.3 mN m<sup>-1</sup> for the interfacial tension of 5CB-water.

| # run | $V \times 10^3$ (L) | $r/V^{1/3}$ | $\psi$ | $\gamma$ (mN m <sup>-1</sup> ) |
|-------|---------------------|-------------|--------|--------------------------------|
| 1     | 0.268               | 0.0468      | 1      | 41.63                          |
| 2     | 0.269               | 0.0467      | 1      | 41.71                          |
| 3     | 0.267               | 0.0468      | 1      | 41.48                          |
| 4     | 0.265               | 0.0469      | 1      | 41.17                          |
| 5     | 0.268               | 0.0468      | 1      | 41.63                          |
| AVE   |                     |             |        | 41.53                          |
| error |                     |             |        | 0.27                           |

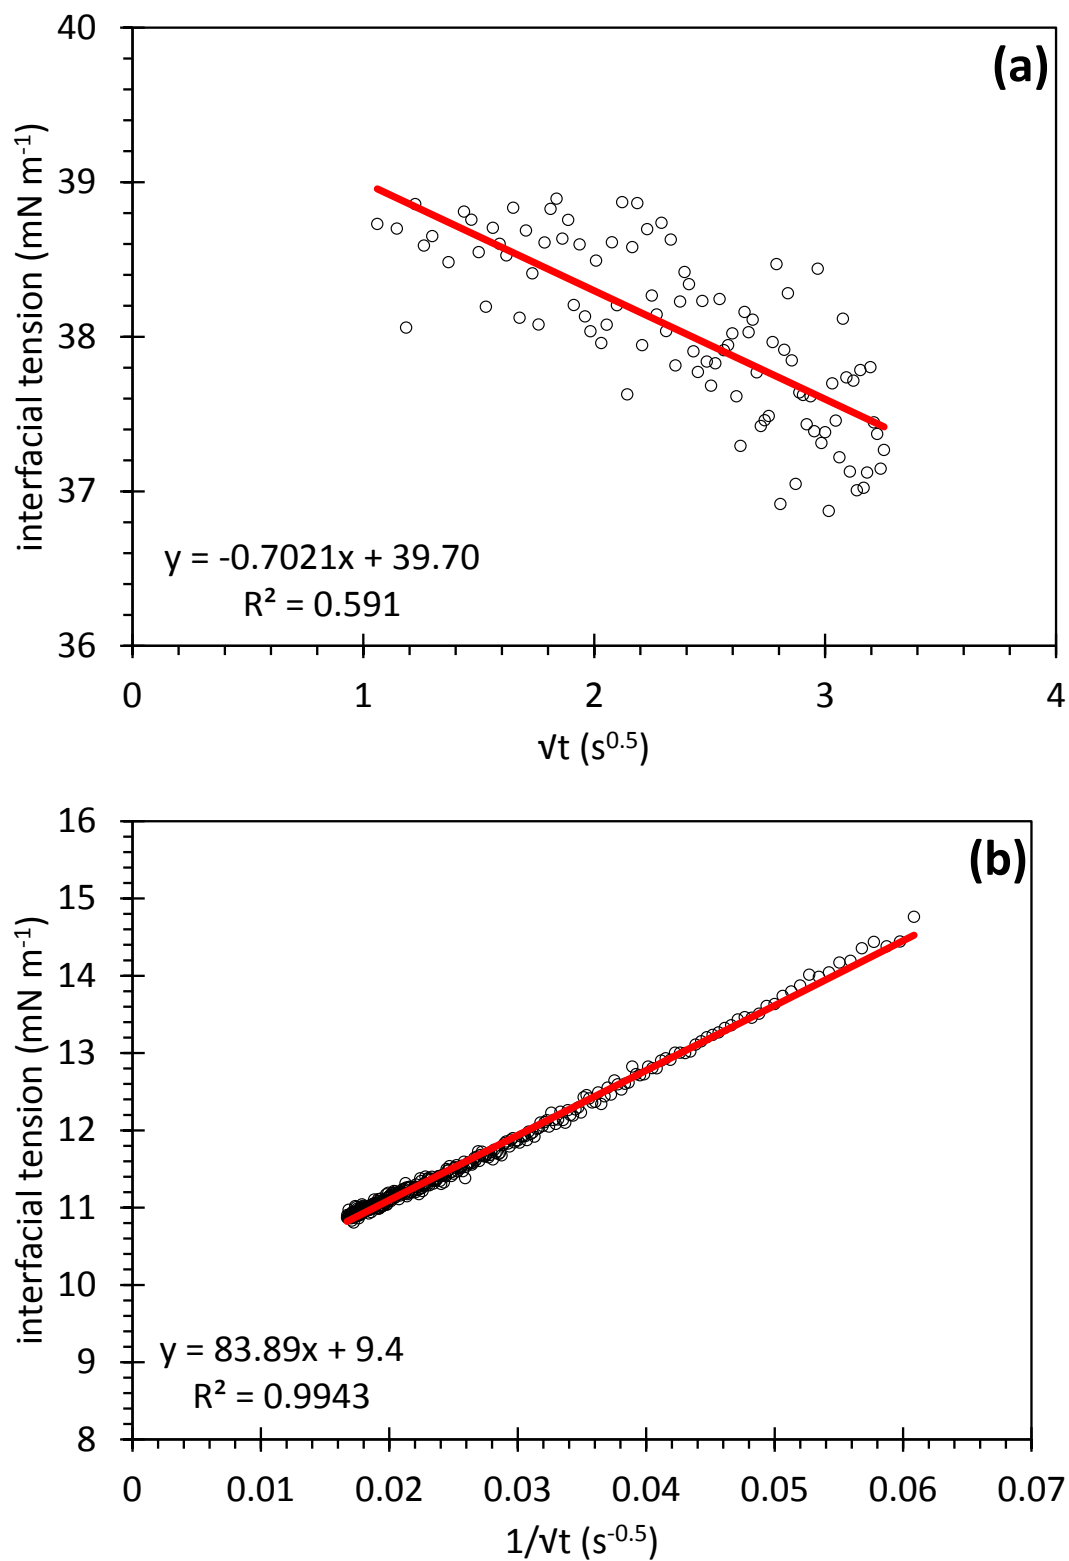

**Figure S1.** Analysis of (a) early- and (b) late-time dynamic IFT data at a concentration of 0.5 g L<sup>-1</sup> EC nanoparticles *via* (a) Eq. (3) and (b) Eq. (4).

**Table S1.** Statistical pair-comparison of 5CB-water IFT determined from early-time dynamic IFT data interpretation ( $\gamma_0$ ). It is assumed that each set of measurements has the same variance and the conclusions are based on 95% confidence interpretation.

| Case # | EC concentration (g L <sup>-1</sup> ) | $\gamma_0$ (mN m <sup>-1</sup> ) | Standard deviation | Number of measurements |
|--------|---------------------------------------|----------------------------------|--------------------|------------------------|
| I      | 0 (pristine 5CB-water interface)      | 40.6                             | 1.15               | 4                      |
| II     | 0.3                                   | 38.5                             | 1.24               | 5                      |
| III    | 0.5                                   | 39.7                             | 1.27               | 5                      |

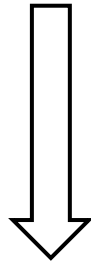

**Hypothesis test:**

**Null hypothesis:** No difference between the mean values

**Alternative hypothesis:** There is a difference between the mean values.

| Comparison pair | $t_{obs.}$ | $T_{critical}$ (from t-distribution table) | Conclusion                                                                                                                                                                   |
|-----------------|------------|--------------------------------------------|------------------------------------------------------------------------------------------------------------------------------------------------------------------------------|
| I vs. II        | 2.48       | 2.36                                       | $t_{obs.} < T_{critical} \rightarrow$ Fail to reject the null hypothesis $\rightarrow$ No difference between $\gamma_0$ at different levels of EC concentration is detected. |
| I vs. III       | 1.1        | 2.36                                       |                                                                                                                                                                              |
| II vs. III      | 1.26       | 2.31                                       |                                                                                                                                                                              |

**Table S2.** Statistical pair-comparison of adsorption energy ( $|\Delta E|$ ) computed from different approaches and at different EC nanoparticle concentrations. It is assumed that each set of measurements has the same variance and the conclusions are based on 95% confidence interpretation.

| Approach                    | EC concentration (g L <sup>-1</sup> ) |                               |
|-----------------------------|---------------------------------------|-------------------------------|
|                             | 0.3                                   | 0.5                           |
| Bizmark et al. <sup>3</sup> | (I)<br>5.7±0.3<br># runs = 5          | (II)<br>5.6±0.9<br># runs = 5 |
|                             |                                       |                               |
| Du et al. <sup>4</sup>      | (III)<br>5.3±0.2<br># runs = 5        | (IV)<br>5.2±0.2<br># runs = 5 |
|                             |                                       |                               |
| Pieranski <sup>5,6</sup>    | (V)<br>5.1±0.3<br># runs = 4          |                               |

**Hypothesis test:**

**Null hypothesis:** No difference between the mean values

**Alternative hypothesis:** There is a difference between the mean values.

1.  $t_{obs.} < T_{critical}$  → Fail to reject the null hypothesis → There is no significant difference between the slopes.
2.  $t_{obs.} > T_{critical}$  → Reject the null hypothesis (marked by a ×) → There is a significant difference between the slopes.

All of possible comparisons are shown in the following figure.  $t_{obs}$  is calculated from  $\frac{|\bar{X}_1 - \bar{X}_2|}{\sqrt{\frac{s_1^2}{n_1} + \frac{s_2^2}{n_2}}}$ ,

where  $\bar{X}$ ,  $s$ , and  $n$  are the mean value, standard deviation, and the number of replicates, respectively and subscripts 1 and 2 show two different series.  $T_{critical}$  is found from t-table at a 95% confidence level. The black and red bars should be compared to the  $T_{critical}$  indicated by the black and red lines, respectively. Only in three comparisons we rejected the null hypothesis (see the following graph).

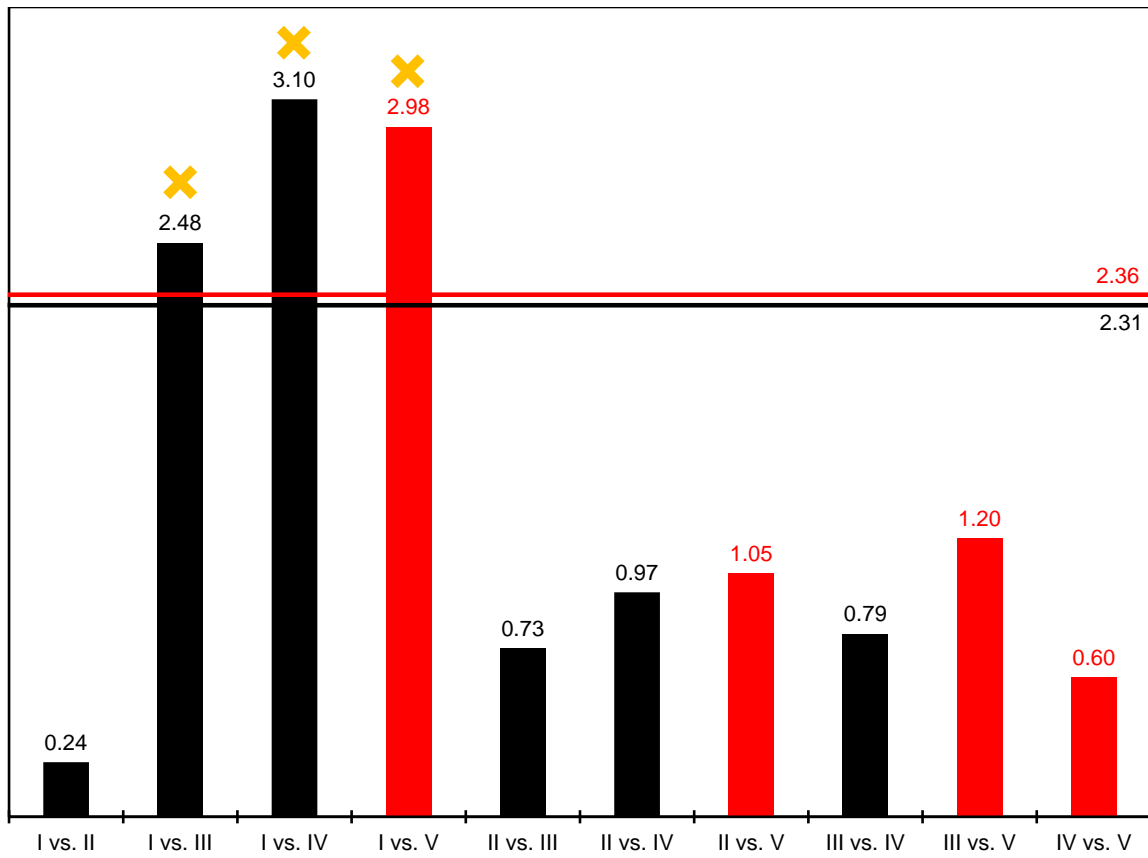

## **REFERENCES**

- (1) W. D. Harkins and F. E. Brown. The determination of surface tension (free surface energy), and the weight of falling drops: the surface tension of water and benzene by the capillary height method. *J. A. Chem. Soc.* **1919**, 41, 499.
- (2) M. C. Wilkinson and M. P. Aronson. Applicability of the drop-weight technique to the determination of the surface tensions of liquid metals. *J. Chem. Soc., Faraday Trans. 1* **1973**, 69, 474.
- (3) N. Bizmark, M. A. Ioannidis, D. E. Henneke. Irreversible adsorption-driven assembly of nanoparticles at fluid interfaces revealed by a dynamic surface tension probe. *Langmuir* **2014**, 30, 710.
- (4) K. Du, E. Glogowski, T. Emrick, T. P. Russell, A. D. Dinsmore. Adsorption energy of nano- and microparticles at liquid-liquid interfaces. *Langmuir* **2010**, 26, 12518.
- (5) Pieranski, P. Two-dimensional interfacial colloidal crystals. *Phys. Rev. Lett.* **1980**, 45 (7), 569-572.
- (6) B. P. Binks. Particles as surfactants—similarities and differences. *Curr. Opin. Colloid Interface Sci.* **2002**, 7, 21.
